# Supplementary material for: Occurrence of Lymphangiogenesis in Peripheral Nerve Autografts Contrasts Schwann Cell-Induced Apoptosis of Lymphatic Endothelial Cells In Vitro
Source: MDPI journal article supplement (doi:10.3390/biom12060820), 2022-06-12
Supplement: s1 [file s1]

## Supplementary Figures

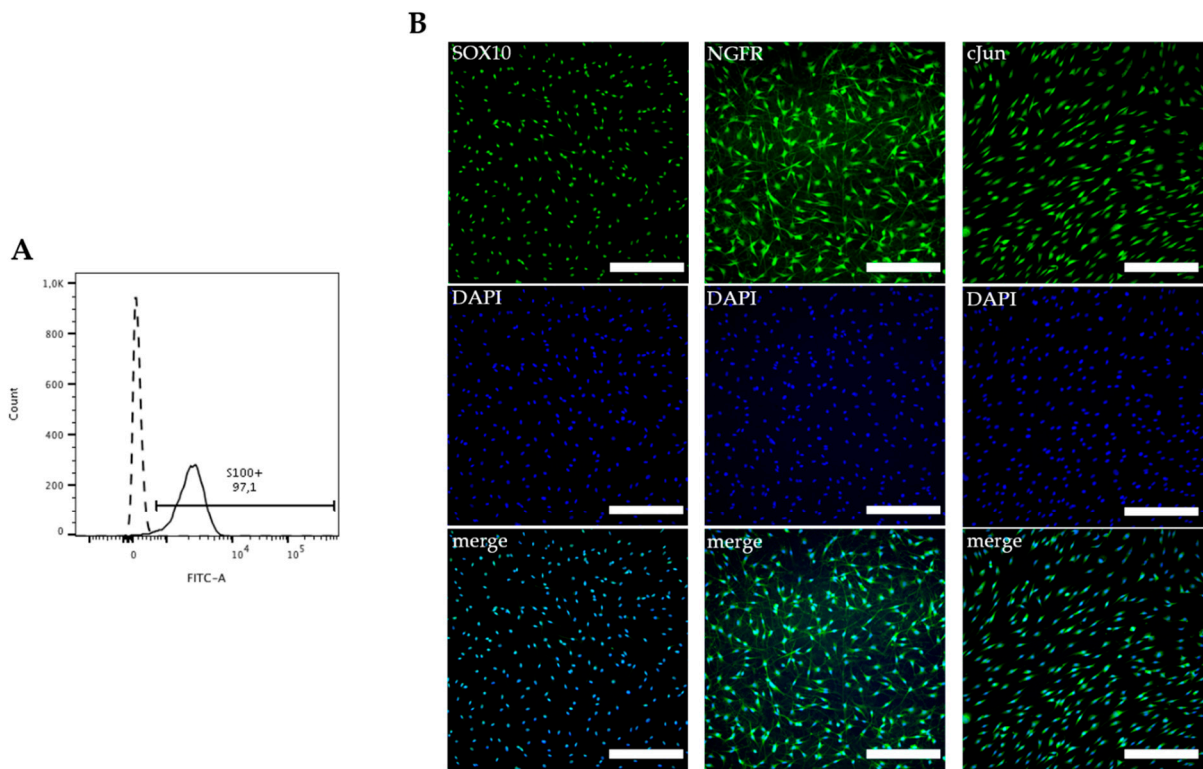

**Supplementary Figure S1: Characterization of primary rat Schwann cell cultures.** A) Representative flow cytometry histogram showing a high purity of >97% S100+ Schwann cells. Dashed line represents secondary antibody control, solid line shows S100 stained cells. B) Representative immunofluorescence images of Schwann cells stained against SOX10, NGFR and cJun. A DAPI counterstain was performed to visualize nuclei. Scale bars = 200  $\mu$ m.

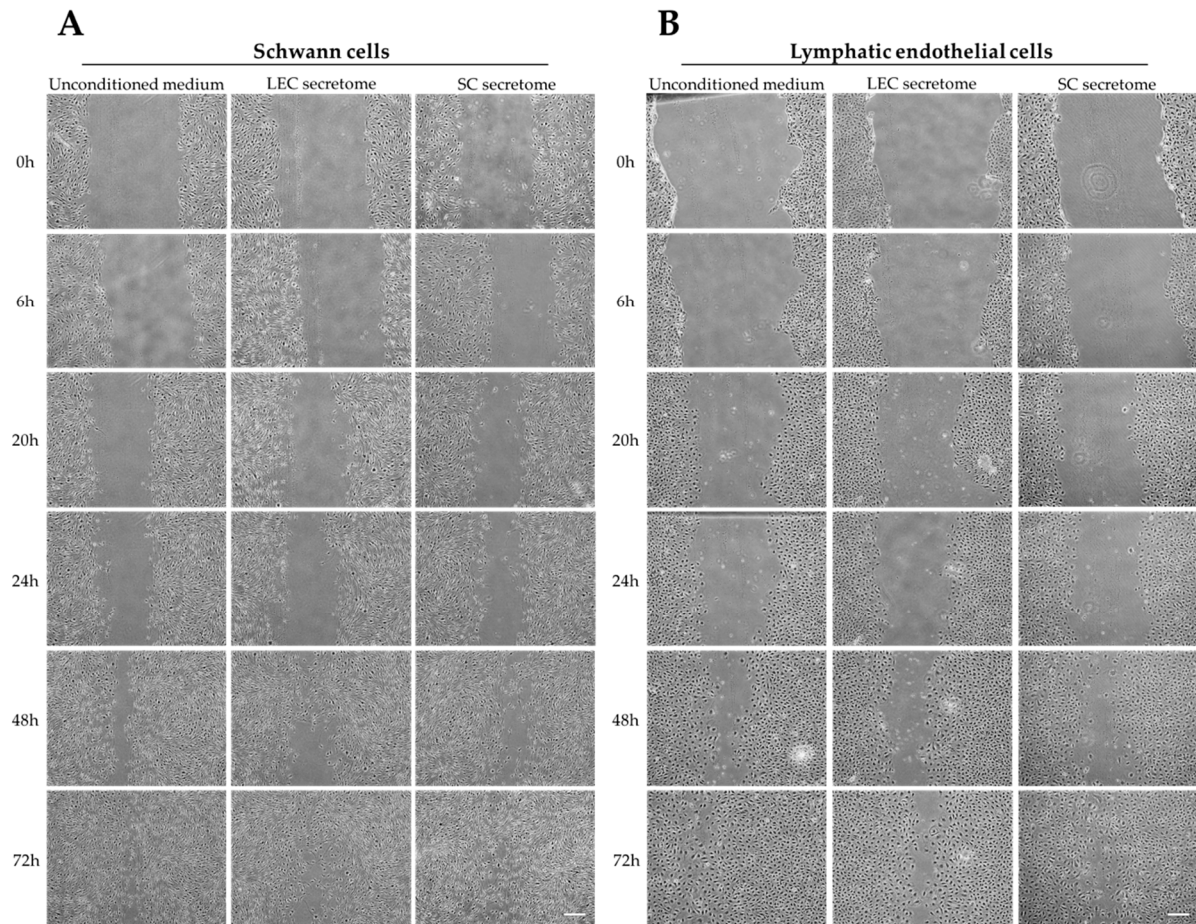

**Supplementary Figure S2: Representative images of the Schwann cell and lymphatic endothelial cell scratch assay experiments.** SCs (A) and LECs (B) were grown until confluency and their conditioned media were collected 24 hours before the experiment. Scratches were created on cell monolayers and cell migration in either unconditioned medium or conditioned medium from LEC or SC was monitored over a total of 72 hours. Scale bars = 300  $\mu\text{m}$ .

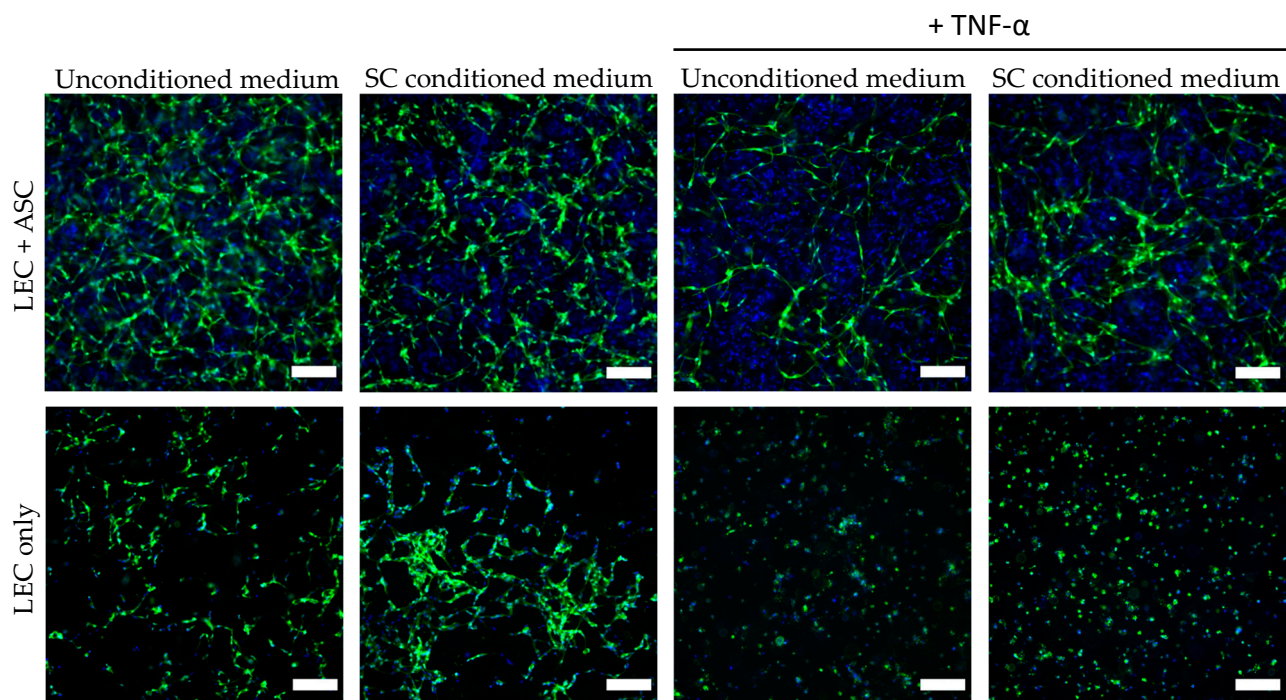

**Supplementary Figure S3: Lymphatic network formation is hindered when cultivated in Schwann cell-conditioned medium.** LECs and ASCs or LECs only were cultivated in fibrin hydrogels for 7 days containing either unconditioned medium or Schwann-cell conditioned medium. LECs failed to form tube-like structures when cultivated in SC-conditioned medium and furthermore clustered together. In contrast, this effect was less pronounced when LECs were cultivated with ASCs. Green – LECs. Scale bars = 200  $\mu$ m.

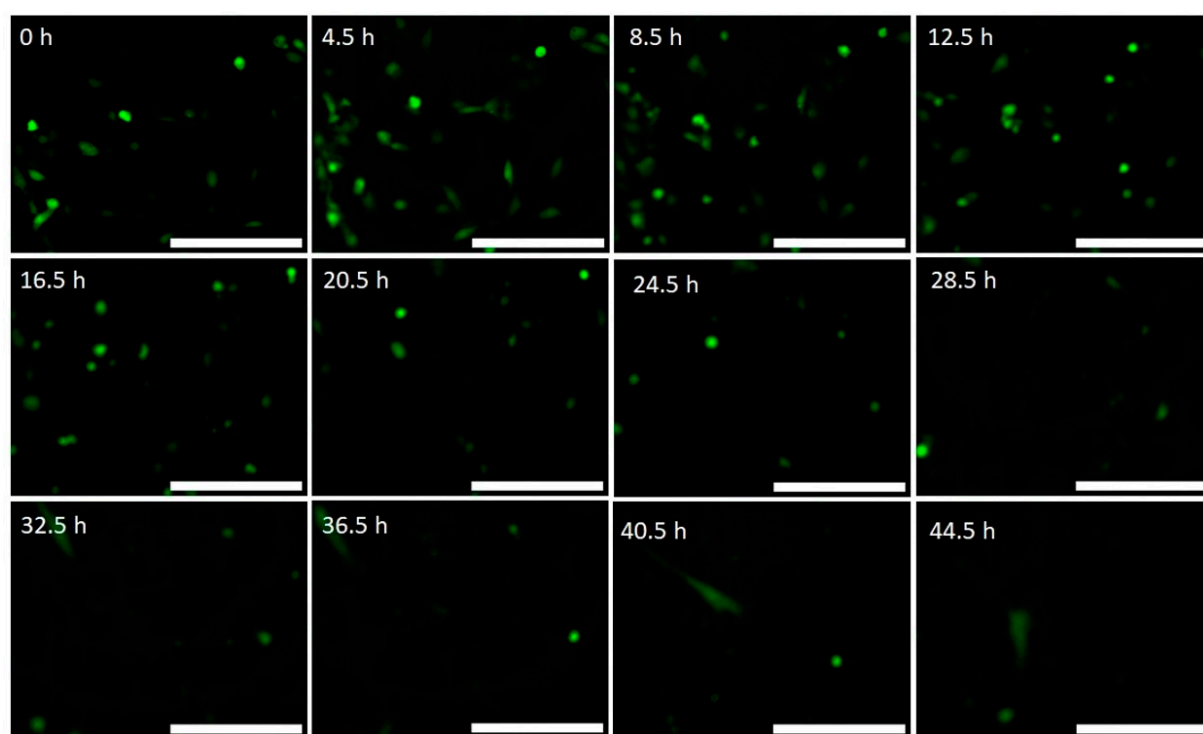

**Supplementary Figure S4: Live cell imaging of YFP-LEC and SC co-culture with the JuLI Smart fluorescent analyzer offers visual confirmation of the diminishing number of YFP-LECs present in the selected field of view, over 48 hours.** Exhibited in this figure are selected images collected during the 48-hour time period showcasing YFP-LECs exhibiting green fluorescence. SCs are not fluorescently labeled and are therefore not visualized here. Scale bars = 100  $\mu$ m.

# Supplementary Tables:

Supplementary Table S1: Detailed statistics report of Angiotool network quantification.

|                                          | Tubule length rel. pos. ctrl |                    |                  |         |                  | No of Junctions rel. pos. ctrl |                    |                  |         |                  | Vessels percentage area |                    |                  |         |                  |    |    |
|------------------------------------------|------------------------------|--------------------|------------------|---------|------------------|--------------------------------|--------------------|------------------|---------|------------------|-------------------------|--------------------|------------------|---------|------------------|----|----|
| Tukey's multiple comparisons test        | Mean Diff,                   | 95,00% CI of diff, | Below threshold? | Summary | Adjusted P Value | Mean Diff,                     | 95,00% CI of diff, | Below threshold? | Summary | Adjusted P Value | Mean Diff,              | 95,00% CI of diff, | Below threshold? | Summary | Adjusted P Value | n1 | n2 |
| LEC + SC + ASC vs. LEC + SC + ASC + TNF  | 49.81                        | 32,70 to 66,92     | Yes              | ****    | <0,0001          | 42.54                          | 18,84 to 66,24     | Yes              | ****    | <0,0001          | 21.19                   | 15,72 to 26,66     | Yes              | ****    | <0,0001          | 24 | 23 |
| LEC + SC + ASC vs. LEC + SC              | 73.57                        | 49,64 to 97,51     | Yes              | ****    | <0,0001          | 64.2                           | 31,05 to 97,36     | Yes              | ****    | <0,0001          | 28.16                   | 20,51 to 35,81     | Yes              | ****    | <0,0001          | 24 | 8  |
| LEC + SC + ASC vs. LEC + SC + TNF        | 67.22                        | 44,30 to 90,14     | Yes              | ****    | <0,0001          | 60.55                          | 28,80 to 92,29     | Yes              | ****    | <0,0001          | 26.54                   | 19,22 to 33,87     | Yes              | ****    | <0,0001          | 24 | 9  |
| LEC + SC + ASC vs. LEC + ASC             | -20.68                       | -37,13 to -4,230   | Yes              | **      | 0.0041           | -34.47                         | -57,25 to -11,69   | Yes              | ***     | 0.0002           | -9.524                  | -14,78 to -4,268   | Yes              | ****    | <0,0001          | 24 | 27 |
| LEC + SC + ASC vs. LEC + ASC + TNF       | -4.885                       | -21,33 to 11,56    | No               | ns      | 0.984            | -16.39                         | -39,17 to 6,392    | No               | ns      | 0.3482           | -1.525                  | -6,934 to 3,883    | No               | ns      | 0.9882           | 24 | 27 |
| LEC + SC + ASC vs. LEC only              | 18.61                        | -4,310 to 41,52    | No               | ns      | 0.2038           | 14.84                          | -16,91 to 46,58    | No               | ns      | 0.8362           | 6.573                   | -0,7503 to 13,90   | No               | ns      | 0.1129           | 24 | 9  |
| LEC + SC + ASC vs. LEC only + TNF        | 72.61                        | 43,79 to 101,4     | Yes              | ****    | <0,0001          | 61.22                          | 21,29 to 101,1     | Yes              | ***     | 0.0002           | 27.56                   | 18,35 to 36,77     | Yes              | ****    | <0,0001          | 24 | 5  |
| LEC + SC + ASC + TNF vs. LEC + SC        | 23.76                        | -0,3009 to 47,83   | No               | ns      | 0.0556           | 21.66                          | -11,67 to 55,00    | No               | ns      | 0.4835           | 6.966                   | -0,7246 to 14,66   | No               | ns      | 0.1062           | 23 | 8  |
| LEC + SC + ASC + TNF vs. LEC + SC + TNF  | 17.41                        | -5,642 to 40,46    | No               | ns      | 0.2867           | 18.01                          | -13,92 to 49,94    | No               | ns      | 0.662            | 5.353                   | -2,013 to 12,72    | No               | ns      | 0.3349           | 23 | 9  |
| LEC + SC + ASC + TNF vs. LEC + ASC       | -70.49                       | -87,12 to -53,85   | Yes              | ****    | <0,0001          | -77.01                         | -100,1 to -53,97   | Yes              | ****    | <0,0001          | -30.72                  | -36,03 to -25,40   | Yes              | ****    | <0,0001          | 23 | 27 |
| LEC + SC + ASC + TNF vs. LEC + ASC + TNF | -54.69                       | -71,33 to -38,06   | Yes              | ****    | <0,0001          | -58.93                         | -81,98 to -35,89   | Yes              | ****    | <0,0001          | -22.72                  | -28,18 to -17,25   | Yes              | ****    | <0,0001          | 23 | 27 |
| LEC + SC + ASC + TNF vs. LEC only        | -31.2                        | -54,26 to -8,151   | Yes              | **      | 0.0014           | -27.7                          | -59,63 to 4,227    | No               | ns      | 0.1402           | -14.62                  | -21,98 to -7,251   | Yes              | ****    | <0,0001          | 23 | 9  |
| LEC + SC + ASC + TNF vs. LEC only + TNF  | 22.8                         | -6,129 to 51,73    | No               | ns      | 0.2363           | 18.68                          | -21,40 to 58,75    | No               | ns      | 0.8382           | 6.369                   | -2,876 to 15,61    | No               | ns      | 0.405            | 23 | 5  |
| LEC + SC vs. LEC + SC + TNF              | -6.354                       | -34,84 to 22,14    | No               | ns      | 0.9972           | -3.659                         | -43,12 to 35,80    | No               | ns      | >0,9999          | -1.613                  | -10,72 to 7,491    | No               | ns      | 0.9994           | 8  | 9  |
| LEC + SC vs. LEC + ASC                   | -94.25                       | -117,9 to -70,65   | Yes              | ****    | <0,0001          | -98.68                         | -131,4 to -65,99   | Yes              | ****    | <0,0001          | -37.68                  | -45,22 to -30,14   | Yes              | ****    | <0,0001          | 8  | 27 |
| LEC + SC vs. LEC + ASC + TNF             | -78.46                       | -102,1 to -54,86   | Yes              | ****    | <0,0001          | -80.6                          | -113,3 to -47,91   | Yes              | ****    | <0,0001          | -29.68                  | -37,33 to -22,03   | Yes              | ****    | <0,0001          | 8  | 27 |
| LEC + SC vs. LEC only                    | -54.97                       | -83,46 to -26,48   | Yes              | ****    | <0,0001          | -49.37                         | -88,83 to -9,906   | Yes              | **      | 0.0044           | -21.58                  | -30,69 to -12,48   | Yes              | ****    | <0,0001          | 8  | 9  |
| LEC + SC vs. LEC only + TNF              | -0.9631                      | -34,39 to 32,46    | No               | ns      | >0,9999          | -2.988                         | -49,29 to 43,31    | No               | ns      | >0,9999          | -0.5965                 | -11,28 to 10,08    | No               | ns      | >0,9999          | 8  | 5  |
| LEC + SC + TNF vs. LEC + ASC             | -87.9                        | -110,5 to -65,33   | Yes              | ****    | <0,0001          | -95.02                         | -126,3 to -63,76   | Yes              | ****    | <0,0001          | -36.07                  | -43,28 to -28,86   | Yes              | ****    | <0,0001          | 9  | 27 |
| LEC + SC + TNF vs. LEC + ASC + TNF       | -72.11                       | -94,67 to -49,54   | Yes              | ****    | <0,0001          | -76.94                         | -108,2 to -45,68   | Yes              | ****    | <0,0001          | -28.07                  | -35,39 to -20,75   | Yes              | ****    | <0,0001          | 9  | 27 |
| LEC + SC + TNF vs. LEC only              | -48.61                       | -76,25 to -20,97   | Yes              | ****    | <0,0001          | -45.71                         | -83,99 to -7,426   | Yes              | **      | 0.008            | -19.97                  | -28,80 to -11,14   | Yes              | ****    | <0,0001          | 9  | 9  |
| LEC + SC + TNF vs. LEC only + TNF        | 5.391                        | -27,31 to 38,09    | No               | ns      | 0.9996           | 0.6706                         | -44,63 to 45,97    | No               | ns      | >0,9999          | 1.016                   | -9,434 to 11,47    | No               | ns      | >0,9999          | 9  | 5  |
| LEC + ASC vs. LEC + ASC + TNF            | 15.79                        | -0,1648 to 31,75   | No               | ns      | 0.0546           | 18.08                          | -4,023 to 40,18    | No               | ns      | 0.196            | 7.999                   | 2,742 to 13,26     | Yes              | ***     | 0.0002           | 27 | 27 |
| LEC + ASC vs. LEC only                   | 39.28                        | 16,72 to 61,85     | Yes              | ****    | <0,0001          | 49.31                          | 18,05 to 80,57     | Yes              | ****    | <0,0001          | 16.1                    | 8,886 to 23,31     | Yes              | ****    | <0,0001          | 27 | 9  |
| LEC + ASC vs. LEC only + TNF             | 93.29                        | 64,74 to 121,8     | Yes              | ****    | <0,0001          | 95.69                          | 56,15 to 135,2     | Yes              | ****    | <0,0001          | 37.08                   | 27,96 to 46,21     | Yes              | ****    | <0,0001          | 27 | 5  |
| LEC + ASC + TNF vs. LEC only             | 23.49                        | 0,9250 to 46,06    | Yes              | *       | 0.035            | 31.23                          | -0,02978 to 62,49  | No               | ns      | 0.0504           | 8.099                   | 0,7752 to 15,42    | Yes              | *       | 0.0193           | 27 | 9  |
| LEC + ASC + TNF vs. LEC only + TNF       | 77.5                         | 48,95 to 106,0     | Yes              | ****    | <0,0001          | 77.61                          | 38,07 to 117,1     | Yes              | ****    | <0,0001          | 29.09                   | 19,88 to 38,30     | Yes              | ****    | <0,0001          | 27 | 5  |
| LEC only vs. LEC only + TNF              | 54                           | 21,30 to 86,71     | Yes              | ****    | <0,0001          | 46.38                          | 1,082 to 91,68     | Yes              | *       | 0.0407           | 20.99                   | 10,54 to 31,44     | Yes              | ****    | <0,0001          | 9  | 5  |
